# Supplementary material for: Organo-Ru supported sandwich-type tungstoarsenates: synthesis, structure and catalytic properties
Source: Royal Society of Chemistry journal article supplement (doi:10.1039/c3ce00045a), 2013-01-01
Supplement: c3ce00045a.pdf [file c3ce00045a.pdf]

**Table S11.** Catalytic activities of **AsWRuZn-2** with different amounts for the oxidation of n-hexadecane under green conditions.<sup>[a]</sup>

| Catalyst  | Catalyst amount<br>mg <sup>-1</sup> | Conv<br>[%] | TOF<br>[h <sup>-1</sup> ] | Product selectivity [%] and distribution         |                                             |
|-----------|-------------------------------------|-------------|---------------------------|--------------------------------------------------|---------------------------------------------|
|           |                                     |             |                           | Ketones<br>(7-One:6-One:5-One:4-One:3-One:2-One) | Alcohols<br>(7-Ol:6-Ol:5-Ol:4-Ol:3-Ol:2-Ol) |
| AsWRuZn-2 | 2.5                                 | 38.38       | 2796                      | 51.4<br>(13.5:6.4:8:6.8:7.3:9.4)                 | 22.3<br>(7.6:3:4.8:2.9:3.2:0.8)             |
|           | 5                                   | 46.98       | 1711                      | 52.7<br>(13.6:6.8:8.7:7:7.6:9)                   | 20.7<br>(6.9:2.2:5.3:2.4:2.9:1)             |
|           | 10                                  | 51.49       | 938                       | 55.4<br>(13.8:7.5:9.4:7.3:8.1:9.3)               | 19.1<br>(5.6:2.4:4.9:2:3:1.2)               |
|           | 15                                  | 44.87       | 545                       | 53.9<br>(13.3:7.5:8.8:7.4:7.9:9)                 | 20.6<br>(6.5:2:5.1:3:2.9:1.1)               |

<sup>[a]</sup>Reaction conditions: n-hexadecane: 5 mL, airflow rate: 30 mL·min<sup>-1</sup>, temperature: 150°C, reaction time: 6 h.

**Table S12.** Catalytic activities of **AsWRuZn-2** with different reaction time for the oxidation of n-hexadecane under green conditions.<sup>[a]</sup>

| Catalyst  | Reaction time [h] | Conv [%] | TOF [h <sup>-1</sup> ] | Product selectivity [%] and distribution         |                                             |
|-----------|-------------------|----------|------------------------|--------------------------------------------------|---------------------------------------------|
|           |                   |          |                        | Ketones<br>(7-One:6-One:5-One:4-One:3-One:2-One) | Alcohols<br>(7-Ol:6-Ol:5-Ol:4-Ol:3-Ol:2-Ol) |
| AsWRuZn-2 | 0.5               | 2.23     | 487                    | 55.6<br>(12.7:6.7:6.9:7.4:13.3:8.6)              | 38.2<br>(15.5:4.4:6:4.2:6.9:1.2)            |
|           | 1.5               | 8.99     | 655                    | 48.9<br>(12.6:6.5:7:6.2:8.4:8.2)                 | 32.1<br>(12.5:3.9:5.7:4.5:4.9:0.6)          |
|           | 3                 | 24.78    | 903                    | 51.5<br>(13:7:8.1:6.7:7.8:8.9)                   | 23.6<br>(8.2:3.1:4.9:2.9:3.6:0.9)           |
|           | 4                 | 35.47    | 969                    | 50.3<br>(13.7:6.2:8.1:6.5:7.5:8.3)               | 20.4<br>(6.7:2.3:4.4:2.6:3.4:1)             |
|           | 5                 | 47.29    | 1064                   | 54.1<br>(13.4:7.4:8.3:7.8:8.7:8.5)               | 16.6<br>(5.3:1.8:4.1:1.8:2.5:1.1)           |
|           | 6                 | 51.49    | 938                    | 55.4<br>(13.8:7.5:9.4:7.3:8.1:9.3)               | 19.1<br>(5.6:2.4:4.9:2:3:1.2)               |
|           | 7                 | 55.84    | 871                    | 50.4<br>(12.1:7.3:8.9:6.7:7:8.4)                 | 16.8<br>(4.5:2.2:4.8:1.7:2.5:1.1)           |
|           | 8                 | 59.35    | 810                    | 58.6<br>(14.3:8.5:9.6:7.7:8.3:10.2)              | 17.3<br>(5.2:2.1:4.6:1.8:2.5:1.1)           |
|           | 12                | 73.93    | 673                    | 53.7<br>(13.5:7.1:9.6:7.1:7.8:8.6)               | 17.1<br>(4.9:2:4.8:1.7:2.2:1.3)             |

<sup>[a]</sup>Reaction conditions: n-hexadecane: 5 mL, airflow rate: 30 mL·min<sup>-1</sup>, temperature: 150°C, catalyst: 10mg.

**Table SI3.** Reported catalytic activity of polyoxometalates as catalysts for n-hexadecane oxidation with air.<sup>[a]</sup>

| Catalyst                                                       | Conv [%] <sup>[c]</sup> | TOF [h <sup>-1</sup> ] <sup>[d]</sup> | Product selectivity [%] |          |
|----------------------------------------------------------------|-------------------------|---------------------------------------|-------------------------|----------|
|                                                                |                         |                                       | Ketones                 | Alcohols |
| Blank <sup>[1,2]</sup>                                         | 3.9                     | -                                     | 55                      | 24       |
| Cu20 <sup>[1]</sup>                                            | 7.3                     | 279                                   | 35                      | 37       |
| KNa-1 <sup>[2]</sup>                                           | 38.3                    | 636                                   | 52                      | 22       |
| CsNa-2 <sup>[2]</sup>                                          | 33.7                    | 570                                   | 50                      | 29       |
| CsNa-3 <sup>[2]</sup>                                          | 34.0                    | 605                                   | 51                      | 25       |
| Na-4 <sup>[2]</sup>                                            | 31.8                    | 570                                   | 50                      | 23       |
| Fe <sub>4</sub> Se <sub>2</sub> W <sub>18</sub> <sup>[3]</sup> | 3.0                     | 17                                    | 51.2                    |          |

<sup>[a]</sup> Identical reaction conditions: n-hexadecane: 5 mL, airflow rate: 30 mL·min<sup>-1</sup>, temperature: 150°C, catalyst amount: 10mg, reaction time: 6h

#### References:

- [1] Chen, L. F.; Hu, J. C.; Mal, S. S.; Kortz, U.; Jaensch, H.; Mathys, G.; Richards, R. M. *Chem. Eur. J.* **2009**, *15*, 7490.
- [2] Bi, L. H.; Al-Kadamany, G.; Chubarova, E. V.; Dickman, M. H. L.; Chen, F.; Gopala, D. S.; Richards, R.; Keita, M. B.; Nadjo, L.; Jaensch, H.; Mathys, G.; Kortz, U. *Inorg. Chem.* **2009**, *48*, 10068.
- [3] Chen, L. F.; Zhu, K. K.; Bi, L. H.; Suchopar, A.; Reicke, M.; Mathys, G.; Jaensch, H.; Kortz, U.; Richards, R. M. *Inorg. Chem.* **2007**, *46*, 8457.

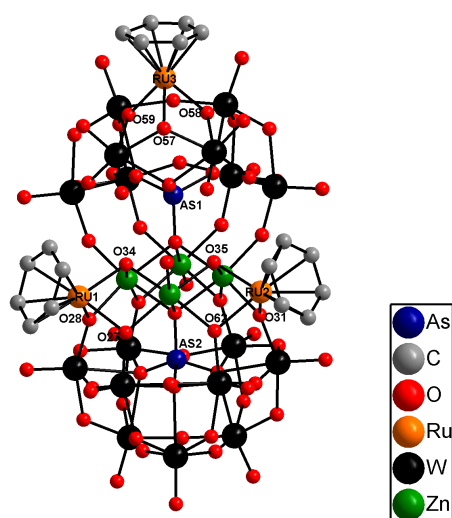

**Figure S11.** The atom-labeling scheme of the ball-and-stick representation of polyanion  $[\{\text{B-}\alpha\text{-AsW}_9\text{O}_{34}\}\{\text{B-}\beta\text{-AsW}_8\text{O}_{31}\}\{\text{Zn}_4(\text{OH})_2(\text{H}_2\text{O})_2\}\{(\text{RuC}_6\text{H}_6)_3\}]^{6-}$  (AsWRuZn-2).

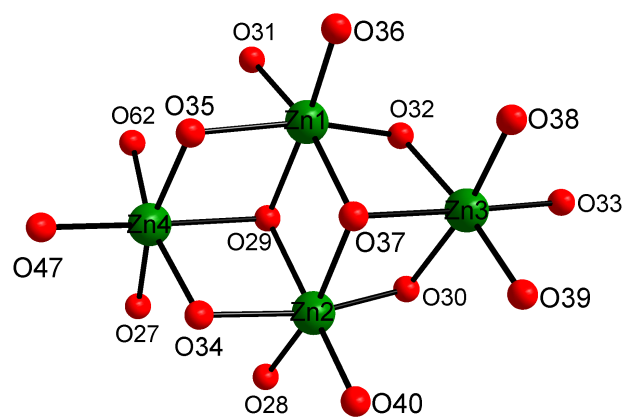

**Figure SI2.** The atom-labeling scheme of the central tetrameric unit  $Zn_4O_{16}$  in **AsWRuZn-2**. The balls represent zinc (olive) and oxygen (red).

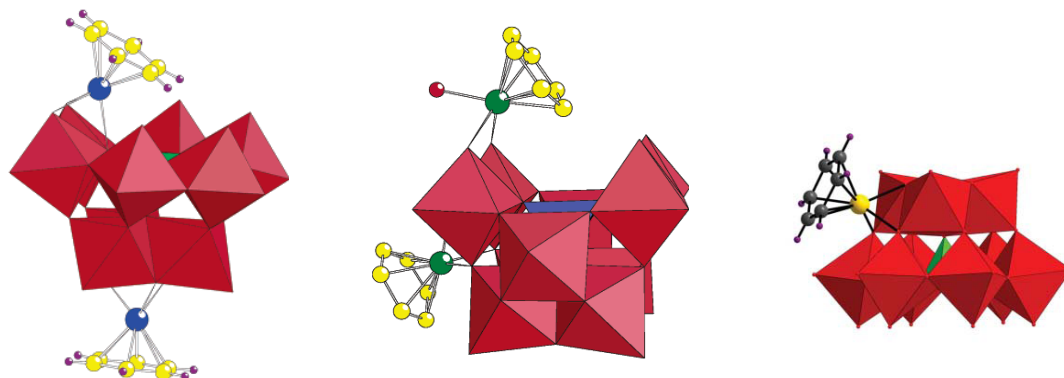

**Figure SI3.** Polyhedral/ball and stick representations of the polyanions (left)  $[(\text{RuC}_6\text{H}_6)_2\text{XW}_9\text{O}_{34}]^{6-}$  ( $\text{X} = \text{Si}, \text{Ge}$ ) (13), (middle)  $[\{\text{Ru}(\text{C}_6\text{H}_6)(\text{H}_2\text{O})\}\{\text{Ru}(\text{C}_6\text{H}_6)\}(\gamma\text{-XW}_{10}\text{O}_{36})]^{4-}$  ( $\text{X} = \text{Si}, \text{Ge}$ ) (14) and  $[(\text{RuC}_6\text{H}_6)\text{XW}_9\text{O}_{34}]^{7-}$  ( $\text{X} = \text{P}, \text{As}$ ) (15) (right).

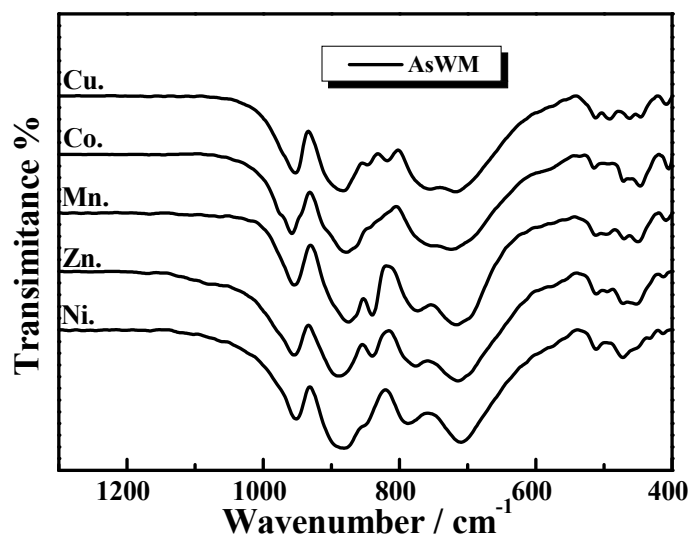

**Figure SI4.** IR spectra of AsWM-6-10.

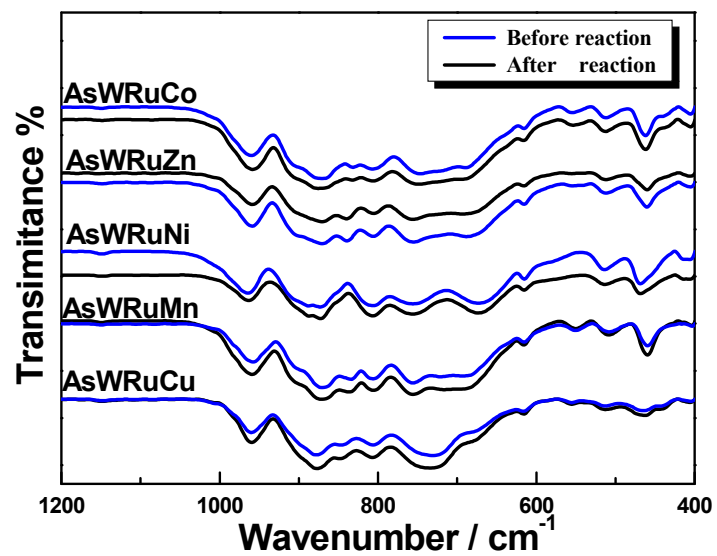

**Figure S15.** IR spectra of AsWRuM-1-5 before (blue) and after (black) catalytic reactions.



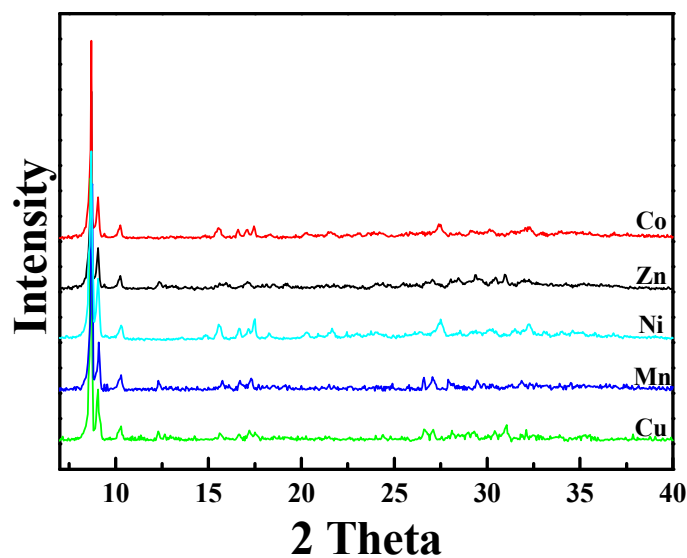

**Figure SI6.** The powder XRD diffraction patterns of compounds **AsWRuM-1-5** after the following treatment process.

The treatment procedure of the samples for powder XRD measurements is described below:

- 1) The crystals of five compounds were picked out under microscopy to ensure their purities;
- 2) These crystals were dried in vacuum dryer for one week to obtain powder samples;
- 3) The powder samples were further crushed to fine powders for XRD measurements.
